# Supplementary material for: A highly sensitive LED-induced chemiluminescence platform for aptasensing of platelet-derived growth factor
Source: Royal Society of Chemistry journal article supplement (doi:10.1039/c3an01566a), 2013-10-11
Supplement: c3an01566a.pdf [file c3an01566a.pdf]

# A sensitive LED-induced chemiluminescence platform for aptasensing of platelet-derived growth factor

Xinfeng Zhang<sup>a,b\*</sup>, Hui Zhang<sup>a</sup>, Shuxia Xu<sup>a,b</sup> and Yonghua Sun<sup>a,b</sup>

<sup>a</sup> *College of material and chemistry & chemical engineering, Chengdu University of  
Technology, Chengdu 610059, China. Tel: +86-28-84079022;*

<sup>b</sup> *Mineral Resources Chemistry Key Laboratory of Sichuan Higher Education  
Institutions, Chengdu University of Technology, Chengdu 610059, China*

*a;*

---

\* Corresponding author at: College of material and chemistry & chemical engineering,

Chengdu university of Technology, Sichuan 610059, China

E-mail: zhangxinfeng09@cdut.cn

Fax: +86-28-84079022

### 1. Reproducibility of LED-CL behaviors for FITC-aptamer

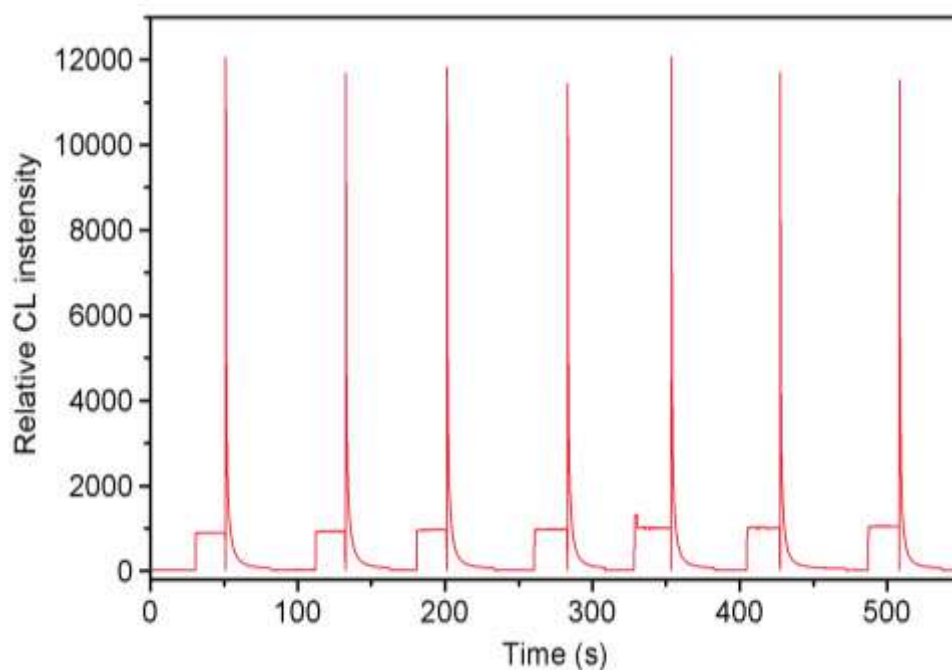

**Fig.S1** Reproducibility of LED-CL behaviors for FITC-aptamer. Experimental conditions: FITC-aptamer concentration, 5 nM; LED color, green; LED irradiation time, 15s; luminol pH, 11.0; and luminol concentration,  $1 \times 10^{-4}$  M

### 2. Absorption spectrum of luminol

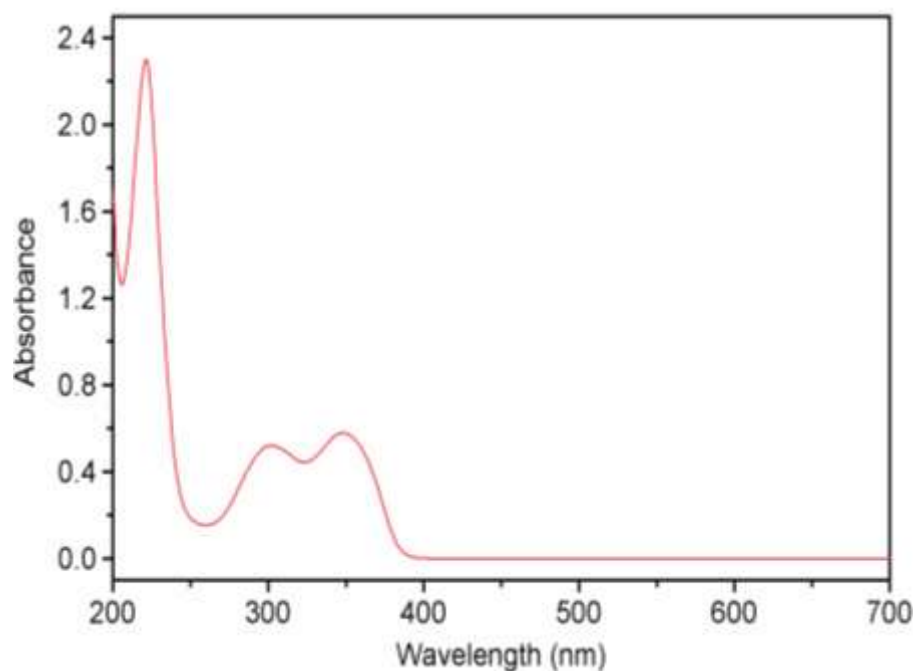

**Fig.S2** The absorption spectrum of luminol

### 3. Absorption spectrum of FITC

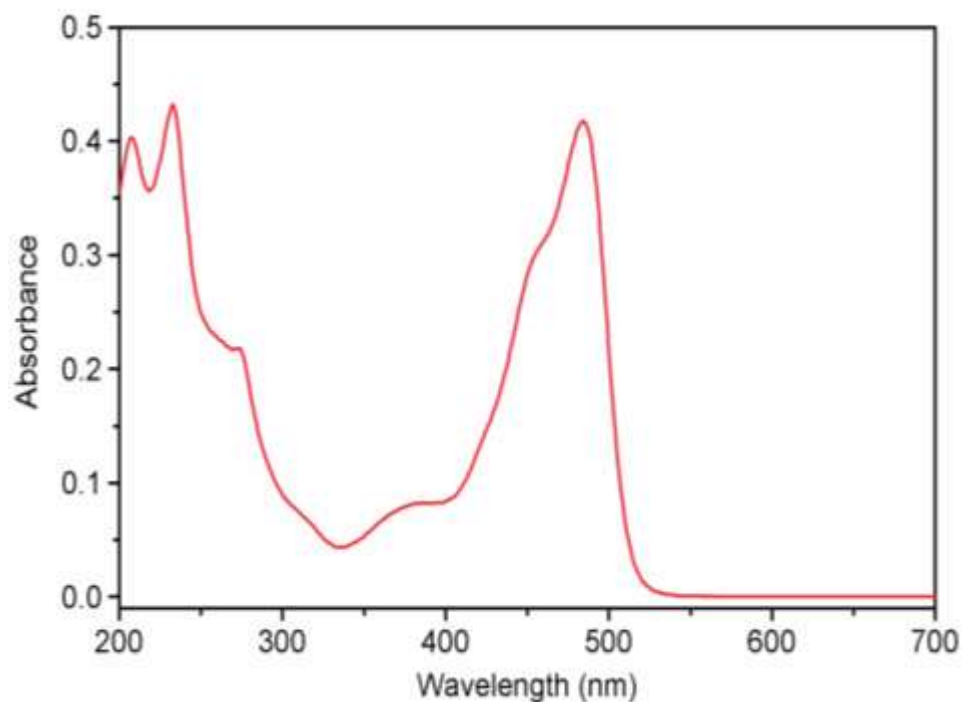

**Fig.S3** The absorption spectrum of FITC

4. Effect of luminol concentration.

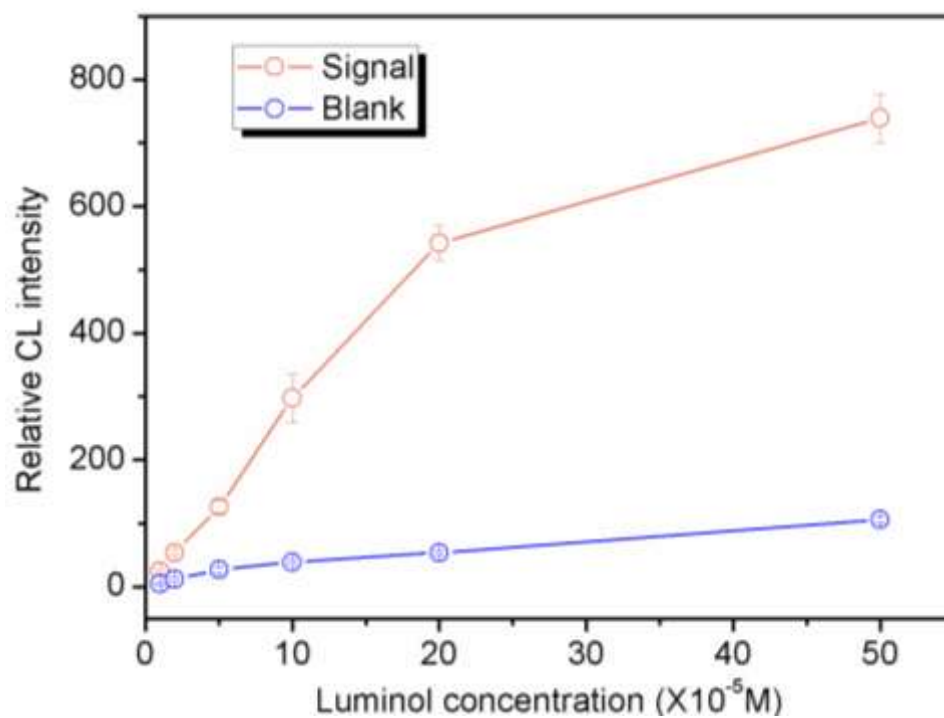

**Fig.S4** Effect of luminol concentration on the LED-CL signals of FITC-aptamer and blank signals. Experimental conditions: FITC- FITC-aptamer concentration, 1 nM; LED color, green; LED irradiation time, 15s; and luminol concentration,  $1 \times 10^{-4}$  M
